# Supplementary material
Source: MDPI journal article supplement (https://www.mdpi.com/2379-139X/7/2/14)
Supplement: s1 [file s1]

**Table S1. Clinical Variables Training Dataset**

| Variable                | Overall Dataset | EGFR Mutant   | EGFR Wildtype | KRAS Mutant   | KRAS Wildtype |
|-------------------------|-----------------|---------------|---------------|---------------|---------------|
| Median Age (Range)      | 69<br>46 - 85   | 71<br>62 - 85 | 69<br>46-84   | 68<br>50 - 81 | 69<br>46 - 85 |
| Gender                  |                 |               |               |               |               |
| Male                    | 59 (83%)        | 6 (8%)        | 53 (75%)      | 14 (20%)      | 45 (63%)      |
| Female                  | 12 (17%)        | 3 (4%)        | 9 (13%)       | 2 (3%)        | 10 (14%)      |
| Smoking Status          |                 |               |               |               |               |
| Current                 | 16 (23%)        | 1 (1%)        | 15 (22%)      | 6 (8%)        | 10 (15%)      |
| Former                  | 47 (66%)        | 6 (8%)        | 41 (58%)      | 10 (14%)      | 37 (52%)      |
| Non-smoker              | 8 (11%)         | 2 (3%)        | 6 (8%)        | 0 (0%)        | 8 (11%)       |
| Pathological T Stage    |                 |               |               |               |               |
| Tis                     | 3 (4%)          | 1 (1%)        | 2 (3%)        | 0 (0%)        | 3 (4%)        |
| T1a                     | 16 (23%)        | 1 (1%)        | 15 (22%)      | 4 (6%)        | 12 (17%)      |
| T1b                     | 16 (23%)        | 3 (4%)        | 13 (19%)      | 3 (4%)        | 13 (19%)      |
| T2a                     | 23 (32%)        | 3 (4%)        | 20 (28%)      | 5 (7%)        | 18 (25%)      |
| T2b                     | 3 (4%)          | 0 (0%)        | 3 (4%)        | 1 (1%)        | 2 (3%)        |
| T3                      | 6 (8%)          | 1 (1%)        | 5 (7%)        | 3 (4%)        | 3 (4%)        |
| T4                      | 4 (6%)          | 0 (0%)        | 4 (6%)        | 0 (0%)        | 4 (6%)        |
| Pathological N Stage    |                 |               |               |               |               |
| N0                      | 54 (76%)        | 8 (11%)       | 46 (65%)      | 12 (17%)      | 42 (59%)      |
| N1                      | 8 (11%)         | 1 (1%)        | 7 (10%)       | 1 (1%)        | 7 (10%)       |
| N2                      | 9 (13%)         | 0 (0%)        | 9 (13%)       | 3 (4%)        | 6 (9%)        |
| Pathological M Stage    |                 |               |               |               |               |
| M0                      | 69 (97%)        | 9 (13%)       | 60 (84%)      | 15 (22%)      | 54 (75%)      |
| M1b                     | 2 (3%)          | 0 (0%)        | 2 (3%)        | 1 (1%)        | 1 (2%)        |
| Histology               |                 |               |               |               |               |
| Adenocarcinoma          | 54 (76%)        | 9 (13%)       | 45 (63%)      | 15 (22%)      | 39 (54%)      |
| Squamous cell carcinoma | 14 (20%)        | 0 (0%)        | 14 (20%)      | 0 (0%)        | 14 (20%)      |
| NSCLC NOS               | 3 (4%)          | 0 (0%)        | 3 (4%)        | 1 (1%)        | 2 (3%)        |

**Table S2. Clinical Variables Test Dataset**

| Variable                | Overall Dataset | EGFR Mutant   | EGFR Wildtype | KRAS Mutant   | KRAS Wildtype |
|-------------------------|-----------------|---------------|---------------|---------------|---------------|
| Median Age (Range)      | 67<br>50 - 81   | 79<br>55 - 81 | 65<br>50 - 81 | 67<br>65 - 79 | 65<br>55 - 81 |
| Gender                  |                 |               |               |               |               |
| Male                    | 6 (50%)         | 1 (8%)        | 5 (42%)       | 3 (25%)       | 3 (25%)       |
| Female                  | 6 (50%)         | 2 (17%)       | 4 (33%)       | 1 (8%)        | 5 (42%)       |
| Smoking Status          |                 |               |               |               |               |
| Current                 | 2 (17%)         | 0 (0%)        | 2 (17%)       | 0 (0%)        | 2 (17%)       |
| Former                  | 9 (75%)         | 2 (17%)       | 7 (58%)       | 4 (33%)       | 5 (42%)       |
| Non-smoker              | 1 (8%)          | 1 (8%)        | 0 (0%)        | 0 (0%)        | 1 (8%)        |
| Pathological T Stage    |                 |               |               |               |               |
| Tis                     | 0 (0%)          | 0 (0%)        | 0 (0%)        | 0 (0%)        | 0 (0%)        |
| T1a                     | 1 (8%)          | 0 (0%)        | 1 (8%)        | 0 (0%)        | 1 (8%)        |
| T1b                     | 3 (25%)         | 2 (17%)       | 1 (8%)        | 0 (0%)        | 3 (25%)       |
| T2a                     | 3 (25%)         | 0 (0%)        | 3 (25%)       | 2 (17%)       | 1 (8%)        |
| T2b                     | 3 (25%)         | 1 (8%)        | 2 (17%)       | 0 (0%)        | 3 (25%)       |
| T3                      | 2 (17%)         | 0 (0%)        | 2 (17%)       | 2 (17%)       | 0 (0%)        |
| T4                      | 0 (0%)          | 0 (0%)        | 0 (0%)        | 0 (0%)        | 0 (0%)        |
| Pathological N Stage    |                 |               |               |               |               |
| N0                      | 11 (92%)        | 2 (17%)       | 9 (75%)       | 4 (34%)       | 7 (58%)       |
| N1                      | 0 (0%)          | 0 (0%)        | 0 (0%)        | 0 (0%)        | 0 (0%)        |
| N2                      | 1 (8%)          | 1 (8%)        | 0 (0%)        | 0 (0%)        | 1 (8%)        |
| Pathological M Stage    |                 |               |               |               |               |
| M0                      | 11 (92%)        | 3 (25%)       | 8 (67%)       | 4 (34%)       | 7 (58%)       |
| M1b                     | 1 (8%)          | 0 (0%)        | 1 (8%)        | 0 (0%)        | 1 (8%)        |
| Histology               |                 |               |               |               |               |
| Adenocarcinoma          | 12 (100%)       | 12 (100%)     | 12 (100%)     | 12 (100%)     | 12 (100%)     |
| Squamous cell carcinoma | 0 (0%)          | 0 (0%)        | 0 (0%)        | 0 (0%)        | 0 (0%)        |
| NSCLC NOS               | 0 (0%)          | 0 (0%)        | 0 (0%)        | 0 (0%)        | 0 (0%)        |
