# Supplementary material
Source: MDPI journal article supplement (https://www.mdpi.com/2379-139X/7/2/14)
Supplement: s1 [file s1]

Architecture 1

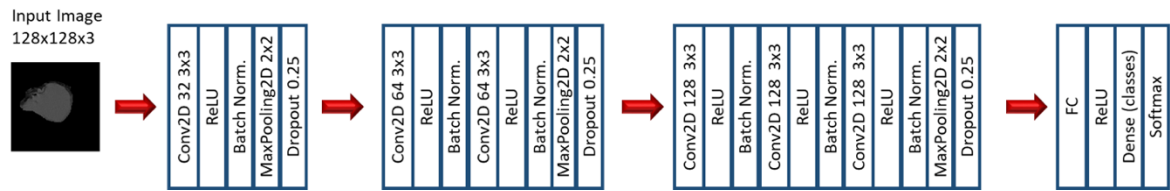

Architecture 2

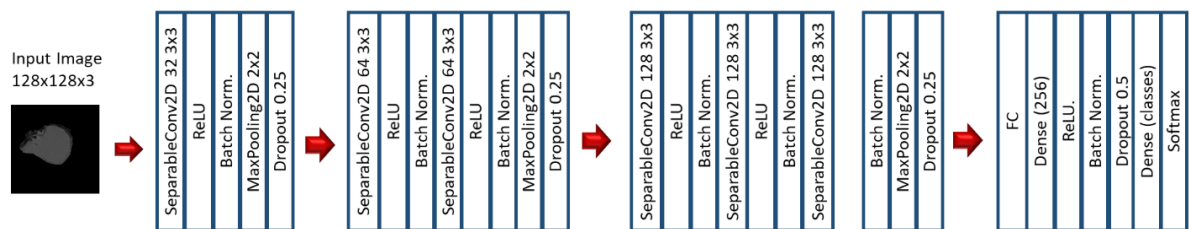

Architecture 3

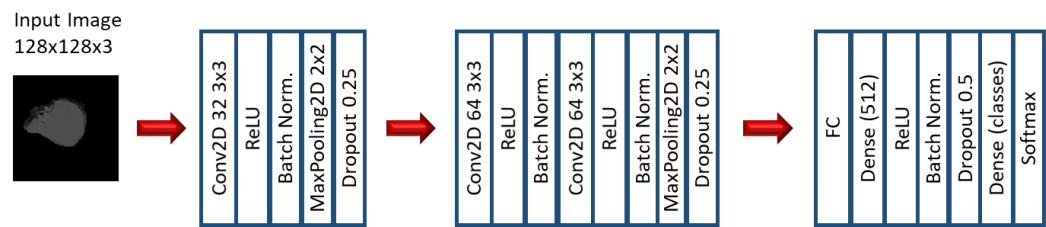

Architecture 4

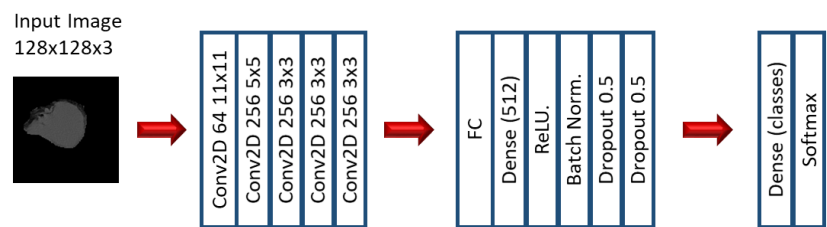

Architecture 5

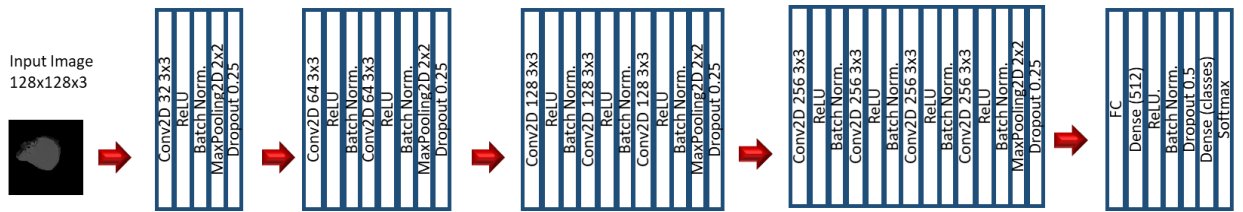

Architecture 6

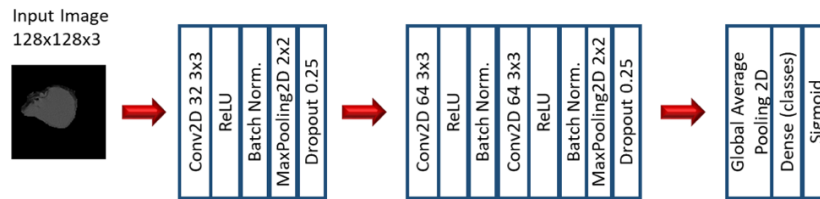

Architecture 7

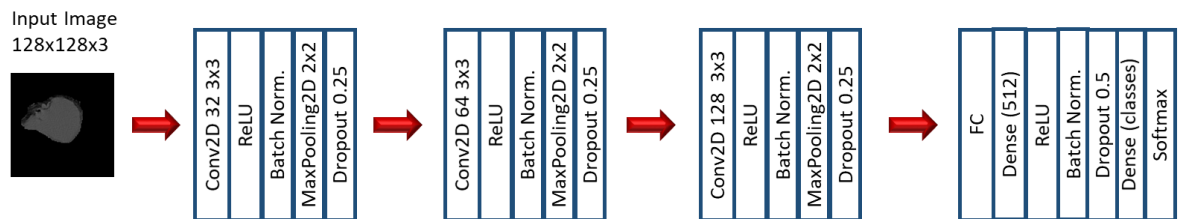

Architecture 8

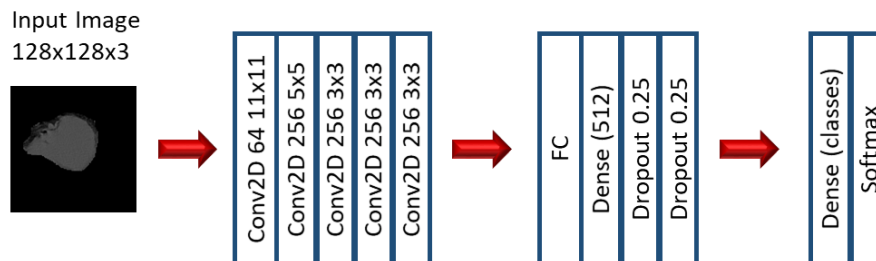

Architecture 9

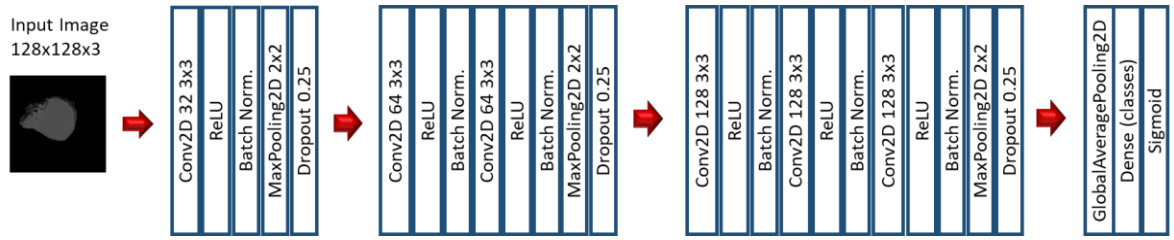

Architecture 10

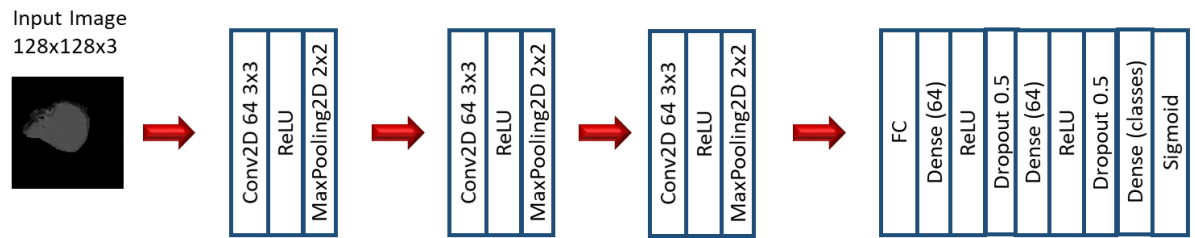

Figure S1 CNN ARCHITECTURES
