# Supplementary material
Source: MDPI journal article supplement (https://www.mdpi.com/2379-139X/7/2/14)
Supplement: s1 [file s1]

## Results Train and Test

**Table S3.** EGFR Mutation Prediction Results Base Classifiers

| Feature Selection            | Classifier | Train       |             |             |             | Test        |             |             |             |
|------------------------------|------------|-------------|-------------|-------------|-------------|-------------|-------------|-------------|-------------|
|                              |            | Acc.        | Sens.       | Spec.       | AUC         | Acc         | Sens.       | Spec.       | AUC         |
| <b>ReliefF (15 features)</b> | <b>SVM</b> | <b>0,83</b> | <b>0,79</b> | <b>0,86</b> | <b>0,88</b> | <b>0,76</b> | <b>0,66</b> | <b>0,78</b> | <b>0,68</b> |
| ReliefF (10 features)        | RF         | 0,99        | 0,99        | 1,00        | 0,99        | 0,76        | 0,41        | 0,82        | 0,67        |
| ReliefF (15 features)        | nnet       | 0,77        | 0,59        | 0,91        | 0,78        | 0,76        | 0,58        | 0,79        | 0,67        |
| ReliefF (5 features)         | RF         | 0,99        | 0,99        | 1,00        | 0,99        | 0,77        | 0,50        | 0,82        | 0,64        |
| ReliefF (20 features)        | RF         | 0,99        | 0,99        | 1,00        | 0,99        | 0,73        | 0,16        | 0,83        | 0,63        |
| ReliefF (20 features)        | SVM        | 0,85        | 0,81        | 0,89        | 0,91        | 0,68        | 0,66        | 0,69        | 0,63        |
| ReliefF (5 features)         | nnet       | 0,74        | 0,60        | 0,86        | 0,80        | 0,71        | 0,50        | 0,75        | 0,60        |
| ReliefF (5 features)         | SVM        | 0,70        | 0,48        | 0,87        | 0,67        | 0,79        | 0,25        | 0,89        | 0,59        |
| ReliefF (15 features)        | RF         | 1,00        | 1,00        | 1,00        | 1,00        | 0,72        | 0,25        | 0,80        | 0,57        |
| MW (5 features)              | gbm        | 0,97        | 0,97        | 0,98        | 0,99        | 0,68        | 0,16        | 0,78        | 0,53        |
| ReliefF (15 features)        | gbm        | 0,99        | 0,99        | 1,00        | 1,00        | 0,72        | 0,25        | 0,80        | 0,52        |
| ReliefF (20 features)        | nnet       | 0,77        | 0,74        | 0,81        | 0,79        | 0,55        | 0,50        | 0,57        | 0,52        |
| MW (20 features)             | SVM        | 0,97        | 0,98        | 0,97        | 0,98        | 0,71        | 0,25        | 0,79        | 0,52        |
| ReliefF (5 features)         | gbm        | 0,97        | 0,95        | 0,98        | 0,99        | 0,71        | 0,33        | 0,78        | 0,51        |
| ReliefF (10 features)        | nnet       | 0,77        | 0,63        | 0,88        | 0,80        | 0,63        | 0,16        | 0,72        | 0,51        |

**Table S4.** KRAS Mutation Prediction Results, Base Classifiers

| Feature Selection           | Classifier | Train       |             |             |             | Test        |             |       |             |
|-----------------------------|------------|-------------|-------------|-------------|-------------|-------------|-------------|-------|-------------|
|                             |            | Acc.        | Sens.       | Spec.       | AUC         | Acc.        | Sens.       | Spec. | AUC         |
| <b>ReliefF (5 features)</b> | <b>SVM</b> | <b>0,67</b> | <b>0,39</b> | <b>0,89</b> | <b>0,73</b> | <b>0,70</b> | <b>0,35</b> | 0,81  | <b>0,65</b> |
| MW (15 features)            | SVM        | 0,85        | 0,77        | 0,91        | 0,92        | 0,64        | 0,40        | 0,72  | 0,64        |
| ReliefF (5 features)        | gbm        | 0,99        | 0,99        | 1,00        | 0,99        | 0,64        | 0,60        | 0,65  | 0,63        |
| ReliefF (20 features)       | gbm        | 0,99        | 0,99        | 1,00        | 0,99        | 0,63        | 0,50        | 0,67  | 0,63        |
| MW (10 features)            | SVM        | 0,82        | 0,73        | 0,89        | 0,90        | 0,64        | 0,45        | 0,70  | 0,63        |
| MW (20 features)            | SVM        | 0,90        | 0,85        | 0,95        | 0,96        | 0,71        | 0,40        | 0,81  | 0,63        |
| ReliefF (15 features)       | SVM        | 0,78        | 0,70        | 0,85        | 0,85        | 0,67        | 0,45        | 0,75  | 0,62        |
| MW (5 features)             | SVM        | 0,73        | 0,48        | 0,91        | 0,83        | 0,71        | 0,35        | 0,83  | 0,62        |
| MW (15 features)            | gbm        | 1,00        | 1,00        | 1,00        | 1,00        | 0,67        | 0,40        | 0,77  | 0,62        |
| ReliefF (15 features)       | RF         | 1,00        | 1,00        | 1,00        | 1,00        | 0,62        | 0,40        | 0,70  | 0,60        |
| MW (10 features)            | gbm        | 1,00        | 1,00        | 1,00        | 1,00        | 0,67        | 0,40        | 0,76  | 0,59        |
| MW (20 features)            | gbm        | 1,00        | 1,00        | 1,00        | 1,00        | 0,69        | 0,30        | 0,81  | 0,59        |
| ReliefF (10 features)       | gbm        | 0,99        | 0,99        | 1,00        | 1,00        | 0,55        | 0,35        | 0,62  | 0,57        |
| MW (5 features)             | nnet       | 0,81        | 0,68        | 0,92        | 0,85        | 0,57        | 0,45        | 0,60  | 0,56        |

**Table S5.** EGFR Mutation Best Results, CNNs

| Model          | Optimizer  | Learning Rate | Epochs    | Train |       |       |       | Test         |              |              |              |
|----------------|------------|---------------|-----------|-------|-------|-------|-------|--------------|--------------|--------------|--------------|
|                |            |               |           | Acc.  | Sens. | Spec. | AUC   | Acc.         | Sens.        | Spec.        | AUC          |
| <b>Arch. 4</b> | <b>SGD</b> | <b>0,0005</b> | <b>30</b> | 0,947 | 0,900 | 0,965 | 0,952 | <b>0,800</b> | <b>0,667</b> | <b>0,846</b> | <b>0,846</b> |
| <b>Arch. 6</b> | <b>SGD</b> | <b>0,0005</b> | <b>30</b> | 0,947 | 0,825 | 0,991 | 0,938 | <b>0,771</b> | <b>0,222</b> | <b>0,961</b> | <b>0,752</b> |
| Arch. 1        | SGD        | 0,01          | 8         | 0,555 | 0,950 | 0,416 | 0,936 | 0,400        | 1,000        | 0,192        | 0,688        |
| Arch. 6        | SGD        | 0,01          | 10        | 0,889 | 0,675 | 0,965 | 0,916 | 0,657        | 0,666        | 0,654        | 0,675        |
| Arch. 3        | SGD        | 0,01          | 7         | 0,791 | 0,900 | 0,752 | 0,916 | 0,543        | 0,778        | 0,461        | 0,671        |
| Arch. 4        | SGD        | 0,01          | 10        | 0,849 | 0,425 | 1,000 | 0,825 | 0,543        | 0,778        | 0,461        | 0,628        |
| Arch. 1        | SGD        | 0,01          | 30        | 0,706 | 0,350 | 0,832 | 0,724 | 0,514        | 0,778        | 0,423        | 0,623        |
| Arch. 2        | SGD        | 0,01          | 30        | 0,565 | 0,162 | 0,849 | 0,652 | 0,542        | 0,667        | 0,538        | 0,571        |
| Arch. 4        | SGD        | 0,01          | 20        | 0,591 | 0,200 | 0,867 | 0,519 | 0,600        | 0,444        | 0,654        | 0,559        |

**Table S6.** KRAS Mutation Best Results, CNNs

| Model          | Optimizer   | Learning Rate | Epochs    | Train        |              |              |              | Test         |              |              |              |
|----------------|-------------|---------------|-----------|--------------|--------------|--------------|--------------|--------------|--------------|--------------|--------------|
|                |             |               |           | Acc.         | Sens.        | Spec.        | AUC          | Acc.         | Sens.        | Spec.        | AUC          |
| <b>Arch. 1</b> | <b>SGD</b>  | <b>0,01</b>   | <b>60</b> | <b>0,698</b> | <b>0,045</b> | <b>0,971</b> | <b>0,602</b> | <b>0,667</b> | <b>0,000</b> | <b>1,000</b> | <b>0,739</b> |
| Arch. 6        | Adam        | 0,005         | 10        | 0,329        | 0,795        | 0,133        | 0,491        | 0,333        | 1,000        | 0,000        | 0,607        |
| Arch. 6        | Adam        | 0,001         | 10        | 0,704        | 0,000        | 1,000        | 0,538        | 0,667        | 0,000        | 1,000        | 0,593        |
| <b>Arch. 1</b> | <b>Adam</b> | <b>0,005</b>  | <b>15</b> | <b>0,751</b> | <b>0,204</b> | <b>0,981</b> | <b>0,588</b> | <b>0,722</b> | <b>0,250</b> | <b>0,958</b> | <b>0,566</b> |
| Arch. 1        | SGD         | 0,01          | 90        | 0,684        | 0,159        | 0,905        | 0,588        | 0,667        | 0,000        | 1,000        | 0,555        |
| <b>Arch. 1</b> | <b>SGD</b>  | <b>0,01</b>   | <b>10</b> | <b>0,637</b> | <b>0,659</b> | <b>0,628</b> | <b>0,700</b> | <b>0,555</b> | <b>0,667</b> | <b>0,500</b> | <b>0,531</b> |
